# Supplementary material for: Profiling Cell Heterogeneity and Fructose Transporter Expression in the Rat Nephron by Integrating Single-Cell and Microdissected Tubule Segment Transcriptomes
Source: MDPI journal article supplement (doi:10.3390/ijms25053071), 2024-03-06
Supplement: s1 [file s1]

| Transporter |         | Substrate affinity (km; mmol/l) |                |                 | Sugar:Na <sup>+</sup><br>coupling | References |
|-------------|---------|---------------------------------|----------------|-----------------|-----------------------------------|------------|
| (Protein)   | (Gene)  | Glucose                         | Fructose       | Na <sup>+</sup> |                                   |            |
| SGLT5       | Slc5a10 | 10.1                            | 0.62           | 36              | 1:1                               | [1, 2, 3]  |
| NaGLT1      | Naglt1  | 3.7                             | ~6.2           | 202             | 1:1                               | [4, 5]     |
| GLUT5       | Slc2a5  | -                               | ~9.3           | -               | -                                 | [6]        |
| SGLT4       | Slc5a9  | 7.7                             | > 10; ~100 (?) | na.             | na.                               | [3, 7]     |

#### References: (1-7)

1. **Ghezzi C, Gorraitz E, Hirayama BA, Loo DD, Grempler R, Mayoux E, and Wright EM.** Fingerprints of hSGLT5 sugar and cation selectivity. *Am J Physiol Cell Physiol* 306: C864-870, 2014.
2. **Grempler R, Augustin R, Froehner S, Hildebrandt T, Simon E, Mark M, and Eickelmann P.** Functional characterisation of human SGLT-5 as a novel kidney-specific sodium-dependent sugar transporter. *FEBS Lett* 586: 248-253, 2012.
3. **Diederich J, Mounkoro P, Tirado HA, Chevalier N, Van Schaftingen E, and Veiga-da-Cunha M.** SGLT5 is the renal transporter for 1,5-anhydroglucitol, a major player in two rare forms of neutropenia. *Cell Mol Life Sci* 80: 259, 2023.
4. **Horiba N, Masuda S, Takeuchi A, Takeuchi D, Okuda M, and Inui K.** Cloning and characterization of a novel Na<sup>+</sup>-dependent glucose transporter (NaGLT1) in rat kidney. *J Biol Chem* 278: 14669-14676, 2003.
5. **Horiba N, Masuda S, Ohnishi C, Takeuchi D, Okuda M, and Inui K.** Na<sup>+</sup>(+)-dependent fructose transport via rNaGLT1 in rat kidney. *FEBS Lett* 546: 276-280, 2003.
6. **Nomura N, Verdon G, Kang HJ, Shimamura T, Nomura Y, Sonoda Y, Hussien SA, Qureshi AA, Coincon M, Sato Y, Abe H, Nakada-Nakura Y, Hino T, Arakawa T, Kusano-Arai O, Iwanari H, Murata T, Kobayashi T, Hamakubo T, Kasahara M, Iwata S, and Drew D.** Structure and mechanism of the mammalian fructose transporter GLUT5. *Nature* 526: 397-401, 2015.
7. **Tazawa S, Yamato T, Fujikura H, Hiratochi M, Itoh F, Tomae M, Takemura Y, Maruyama H, Sugiyama T, Wakamatsu A, Isogai T, and Isaji M.** SLC5A9/SGLT4, a new Na<sup>+</sup>-dependent glucose transporter, is an essential transporter for mannose, 1,5-anhydro-D-glucitol, and fructose. *Life Sci* 76: 1039-1050, 2005.
